# Supplementary material for: A Tale of Two Stories: Astrocyte Regulation of Synaptic Depression and Facilitation
Source: PLOS journal article supplement (doi:10.1371/journal.pcbi.1002293), 2011-12-01
Supplement: S13 (10.1371/journal.pcbi.1002293.s013) [file journal.pcbi.1002293.s013]

301 Moved Permanently

# Moved Permanently

The document has moved here.

---

Apache Server at www.ploscompbiol.org Port 80
