# Supplementary material for: A Tale of Two Stories: Astrocyte Regulation of Synaptic Depression and Facilitation
Source: PLoS Comput Biol. 2011 Dec 1;7(12):e1002293. doi: 10.1371/journal.pcbi.1002293 (PMC3228793; doi:10.1371/journal.pcbi.1002293)
Supplement: Table S1 — Table of parameters of the model of astrocyte-synapse interactions, and corresponding values used in the simulations. (DOC) [file pcbi.1002293.s012.doc]

**Table S1**.

Model parameters and respective values used in simulations.

| **Parameter** | **Description** | **Value** | **Units** |
| --- | --- | --- | --- |
| ***U*0*** | Basal probability of synaptic glutamate release | <0.05 – 0.9a | – |
| **Ωd** | Rate of recovery of released synaptic vesicles | 0.5 – 100a | s-1 |
| **Ωf** | Rate of synaptic facilitation | 0.5 – 2a | s-1 |
| **α** | Effect parameter of astrocyte regulation of synaptic release | 0 – 1 | – |
| ***U*A** | Basal release probability of astrocytic glutamate vesicles | <0.8 (0.6) | – |
| **ΩA** | Rate of recovery of released astrocytic vesicles | 0.01 – 450 (0.6) | s-1 |
| ***n*v** | Number of readily releasable astrocytic vesicles | 1 – 6 (4) |  |
| ***G*v** | Glutamate content of astrocytic vesicles | 20 – 150 (50) | mM |
| ***Vv*** | Volume of astrocytic vesicles | 2 – 700 ·10-21 | dm3 |
| ***V*e** | Mixing volume of released astrocytic glutamate | ~10-16 | dm3 |
| ***ρ*A** | Volume ratio *V*v/*V*e | 6.5·10-4 | – |
| **Ωc** | Glutamate clearance rate | >50 – 150 (60) | s-1 |
| ***O*G** | Onset rate of astrocyte modulation | 0.2 – 2 (1.5) | μM-1 s-1 |
| **ΩG** | Recovery rate of astrocyte modulation | <0.5 – 1.2 (0.5) | min-1 |
| ***f*C** | Frequency of Ca2+ oscillations in the astrocyte | 0.01 – 1 (0.1) | Hz |
| ***C*0** | Basal Ca2+ concentration | 0 | – |
| ***I*b** | IP3 threshold concentration for astrocyte Ca2+ dynamics | 0 | – |
| ***k*** | Scaling factor for the IP3 signal | 1 | – |
| ***w*** | Shape factor | 20b | – |
| ***C*thr** | Ca2+ threshold for astrocyte exocytosis of glutamate | 0.13 – 0.8 (0.4) | – |
| ***φ*C** | Phase of Ca2+ oscillations | 0 | rad |

a In the simulations, a *depressing* synapse was characterized by:  Ωd = 2 s-1, Ωf = 3.33 s-1, *U*0* = 0.5; whereas a *facilitating* synapse was given by:  Ωd = 2 s-1, Ωf = 2 s-1, *U*0* = 0.15.

b ***w*** must be a positive even integer.
